# Supplementary material for: Brachytherapy on-a-chip: a clinically-relevant approach for radiotherapy testing in 3d biology
Source: Royal Society of Chemistry journal article supplement (doi:10.1039/d4lc00032c), 2024-01-01
Supplement: d4lc00032c1.pdf [file d4lc00032c1.pdf]

### Double-strand DNA breaks in normoxic vs hypoxic regions of FaDu spheroids after treatment

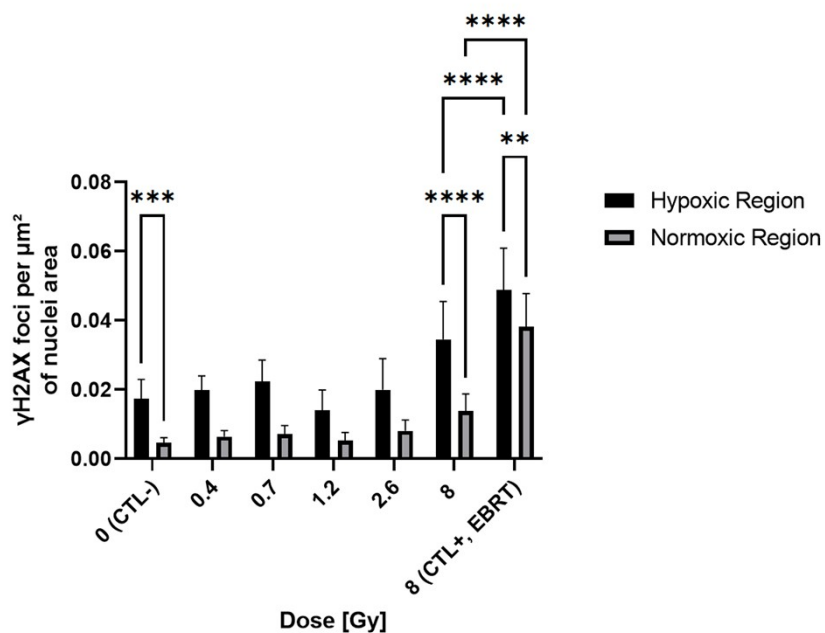

Supplemental Figure 1. Raw density of  $\gamma$ -H2AX foci per nuclei area in normoxic and hypoxic regions of FaDu spheroids, 30 min after irradiation. Mean  $\pm$  s.d., N=3, n>10. There is a statistical difference between normoxic and hypoxic regions at 0 Gy, 8 Gy BT and 8 Gy EBRT ( $p < 0.01$ ), as well as between BT and EBRT for both regions ( $p < 0.0001$ ). Results indicate that hypoxic regions consistently harbor more DNA damages than normoxic regions of FaDu spheroids.
